# Supplementary material for: Detecting emerald green in 19thC book bindings using vis-NIR spectroscopy
Source: Royal Society of Chemistry journal article supplement (doi:10.1039/d3ay01329d), 2023-01-01
Supplement: d3ay01329d1.pdf [file d3ay01329d1.pdf]

Electronic supplementary information

Detecting Emerald Green in 19<sup>th</sup>C book bindings using vis-NIR spectroscopy

M. Pilar Gil\*<sup>a</sup>, Elizabeth Henderson<sup>a</sup>, Jessica Burdge<sup>a</sup>, Erica Kotze<sup>a</sup> and William McCarthy<sup>b</sup>

University Collections Division of the University of St Andrews Libraries and Museums. Library  
Annexe, North Haugh. St Andrews KY16 9WH. E-mail: mpg6@st-andrews.ac.uk

School of Earth & Environmental Sciences. University of St Andrews. Bute Building, Queen's Terrace.  
St Andrews KY16 9TS

Figure S1. Photographs of books identified in this study as containing emerald green pigment.

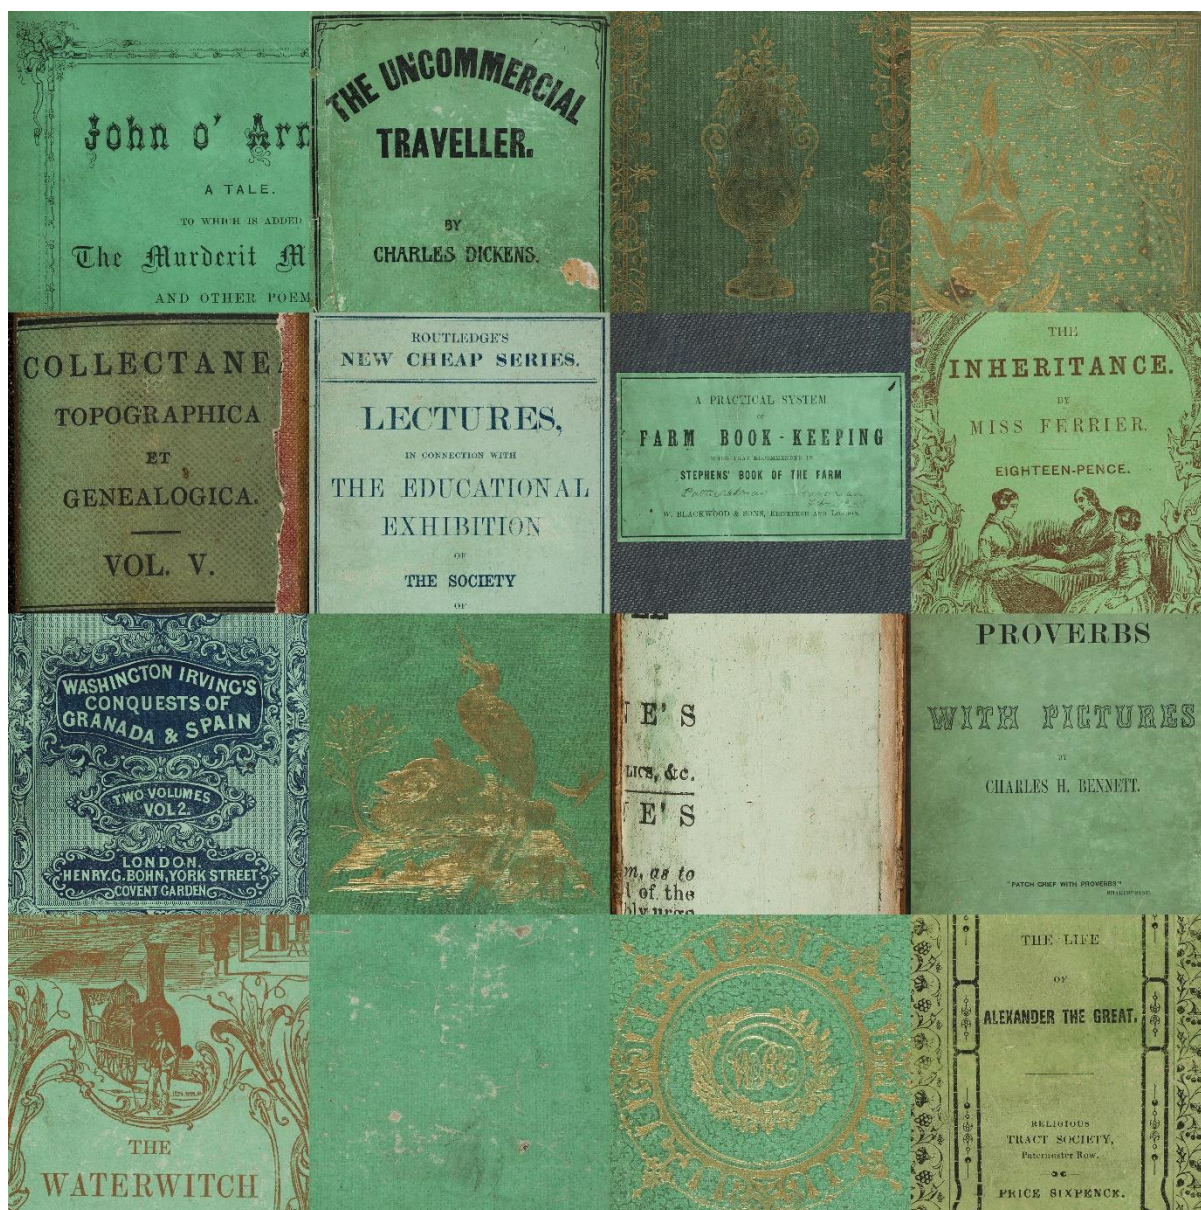

From left to right and top to bottom:

| Classmark    | Title                                                                               | Year of publication | Place of publication | OCLC Number / Unique Identifier: |
|--------------|-------------------------------------------------------------------------------------|---------------------|----------------------|----------------------------------|
| HayPR8661.D4 | John O' Arnha' : a tale : to which is added The murderit mystrell, and other poems. | 1879                | Aberdeen             | N/A                              |
| sPR4572.U6   | The uncommercial traveller                                                          | 1866                | London               | 1262987773                       |
| DonPS2250.E  | The poetical works of Henry Wadsworth Longfellow                                    | c. 1881             | Edinburgh            | 934278551                        |
| rN7635.C7E53 | The court album: Fourteen Portraits of the female aristocracy.                      | 1853                | London               | N/A                              |

|                         |                                                                                                                                             |         |                   |            |
|-------------------------|---------------------------------------------------------------------------------------------------------------------------------------------|---------|-------------------|------------|
| PerDA20.C6              | Collectanea topographica et genealogica.                                                                                                    | 1835    | London            | 1150453    |
| sLB41.L4E8              | Lectures, in connection with the educational exhibition of the Society of Arts, Manufactures, and Commerce, Delivered at St. Martin's Hall. | 1854    | London            | 976024372  |
| sS567.S8                | A practical system of farm book-keeping                                                                                                     | 1856    | Edinburgh         | 36645935   |
| HarPR4699.F4I54<br>1855 | The inheritance                                                                                                                             | c. 1855 | London            | 436691317  |
| HarDP122.I7 1850        | A chronicle of the conquest of Granada                                                                                                      | 1850    | London            | 156761505  |
| sQH45.M2                | Studies from nature                                                                                                                         | 1855    | London            | 8088779    |
| DonPA3.R4.M9            | Rheinisches Museum für Philologie.                                                                                                          | 1839    | Frankfurt am Main | 960872729  |
| rNC1479.B46P76E59       | Proverbs : with pictures                                                                                                                    | 1859    | London            | 1202843801 |
| HarPS1418.W3 1850       | The water witch; or, The skimmer of the seas : a tale                                                                                       | 1850    | London            | 826456578  |
| DonPA6007.B2E40         | Geschichte Der Römische Literatur Im Karolingischen Zeitalter.                                                                              | 1840    | Karlsruhe         | 700362110  |
| sPS94.H2                | Hand-book of American literature, historical, biographical, and critical                                                                    | c. 1870 | London            | 29205890   |
| DonDF234.R46            | The life of Alexander the Great.                                                                                                            | c. 1846 | London            | 497470580  |
